# Supplementary material
Source: publisher site journal article supplement (https://www.dovepress.com/article/457112)
Supplement: Supplementary file 1 [file get_supplementary_file.php]

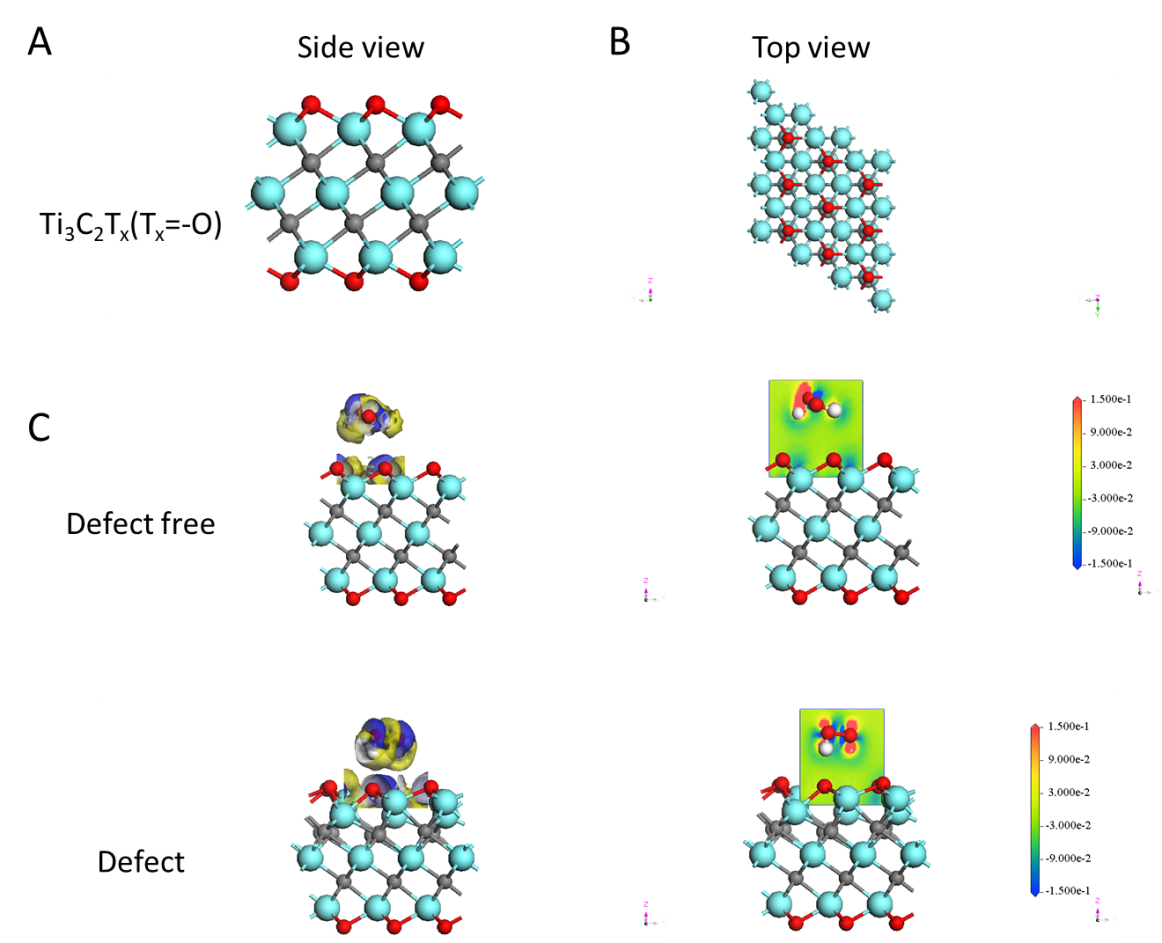


Figure S1. DFT calculations. (A)Side views of Ti3C2Tx(Tx=-O) monolayer structural forms; (B)Top view of Ti3C2Tx(Tx=-O) monolayer structural forms; (C)Side view of adsorption behaviors between Ti3C2Tx(Tx=-O) and H2O2 molecule. The electron density difference of the Ti3C2Tx(Tx=-O) at the defect-free system and Ti –defected system.


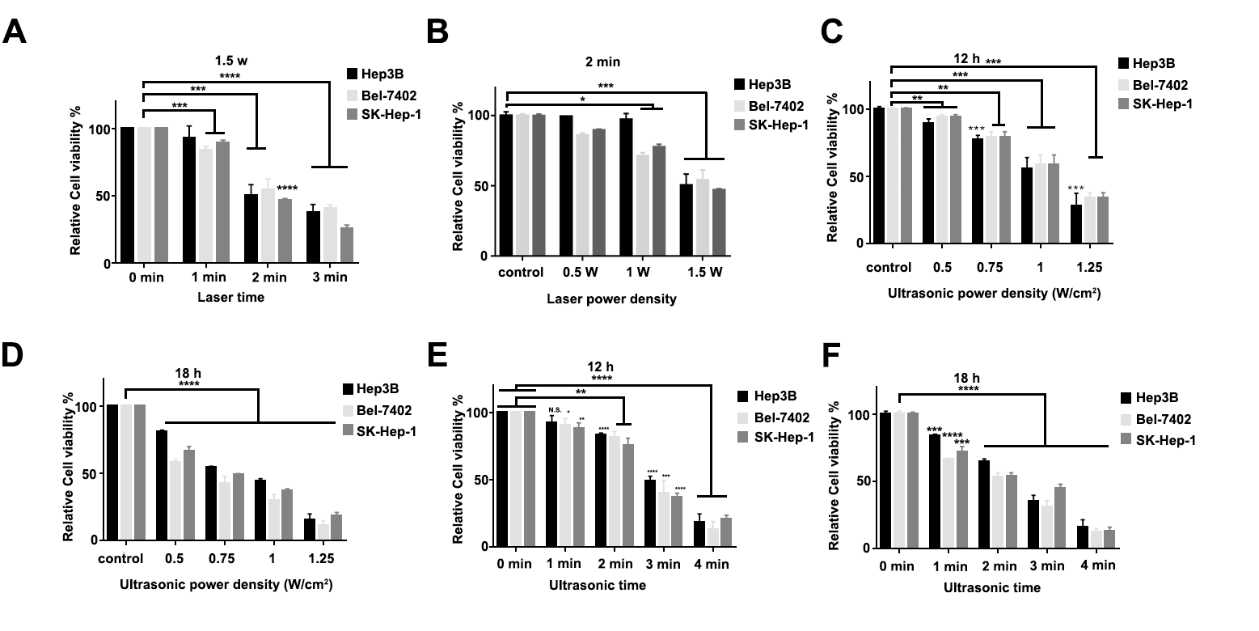


Figure S2. (A) Cell viability of Hep3B, Bel-7402, SK-Hep-1 cells incubated with Ti3C2 at various irradiation times after NIR light irradiation (808 nm, 1.5W/ cm2, 20 ppm); (B) Cell viability of Hep3B, Bel-7402, SK-Hep-1 cells incubated with Ti3C2 at various laser irradiation density (808 nm, 1.5W/ cm2, 2min. (C) Cell viability of Hep3B, Bel-7402, SK-Hep-1 cells incubated with Ti3C2 at various ultrasonic powers under ultrasound after 12 h (3 min, 20 ppm); (D) Cell viability of Hep3B, Bel-7402, SK-Hep-1 cells incubated with Ti3C2 at various ultrasonic powers density under ultrasonic after 18 h (3 min, 20 ppm); (E) Cell viability of Hep3B, Bel-7402, SK-Hep-1 cells incubated with Ti3C2 at various ultrasonic times under ultrasonic after 12 h; (F) Cell viability of Hep3B, Bel-7402, SK-Hep-1 cells incubated with Ti3C2 at various ultrasonic times under ultrasonic after 18 h. * indicates p<0.05, **indicates p<0.01, ***indicates p<0.005, ****indicates p<0.001.


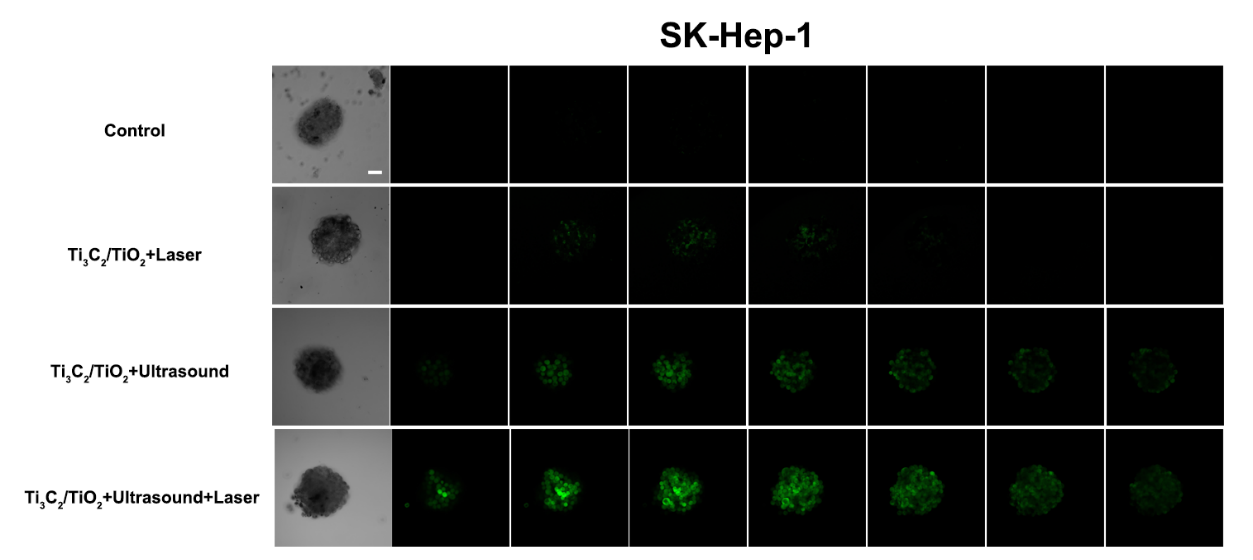


Figure S3. The ROS generation of the tumor mammospheres formed from SK-Hep-1 under different treatment. Scale bar: 50μm.


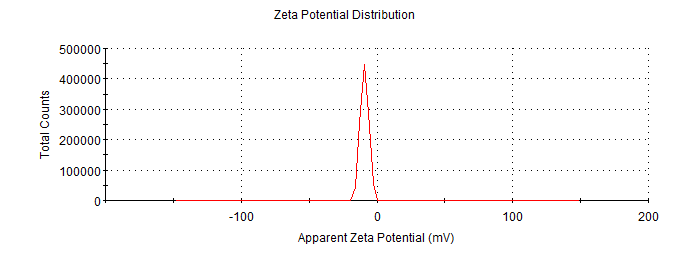


Figure S4 The Zeta potential Ti3C2/TiO2

Figure S5 The quantity of the Ti3C2 intercellular uptake. * indicates p<0.05, ***indicates p<0.005, ****indicates p<0.001.


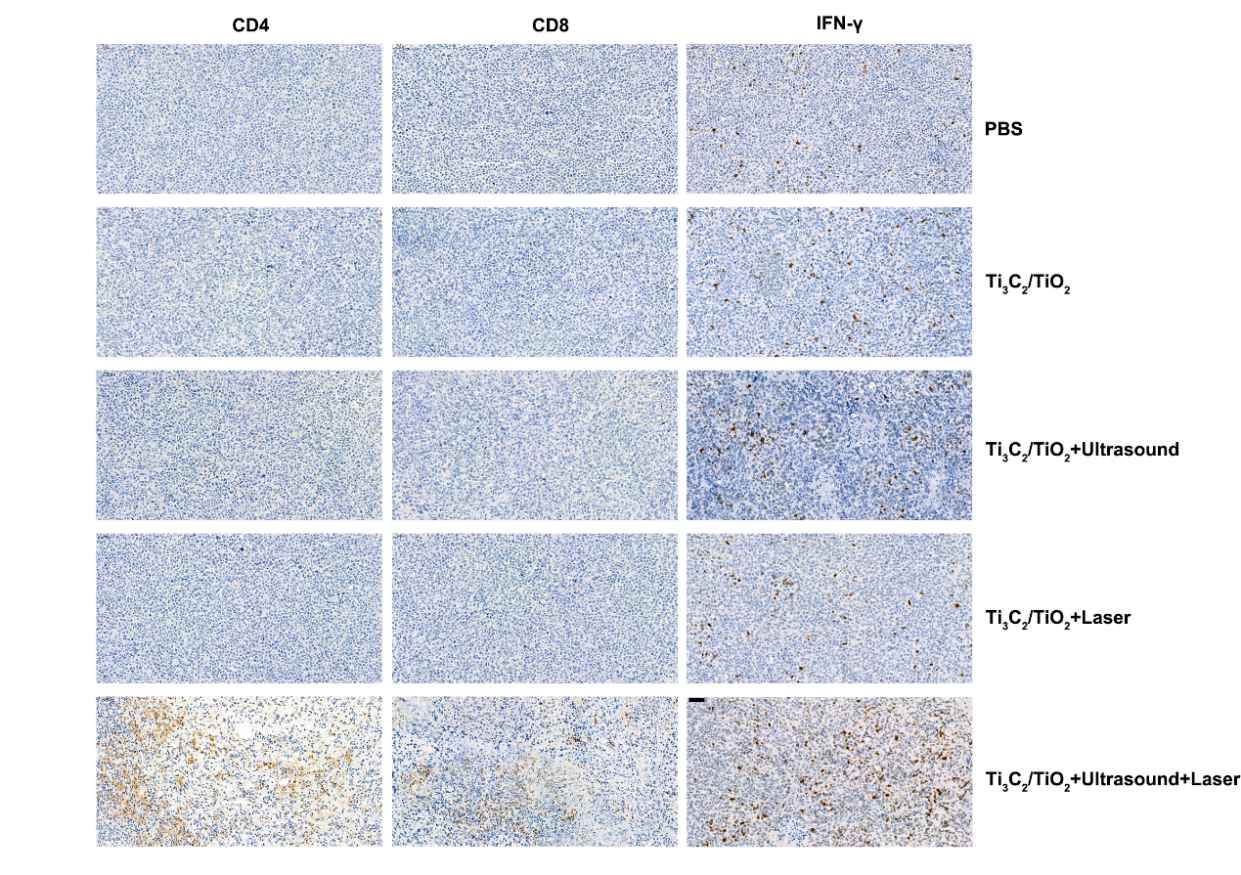


Figure S6 Infiltration of CD4+ and CD8+ T cells and IFN-γ secretion in tumor tissues were examined by immunohistochemical assays. Brown puncta were considered positive expression while blue signals represent nucleus of cells. Scale bar: 50μm.


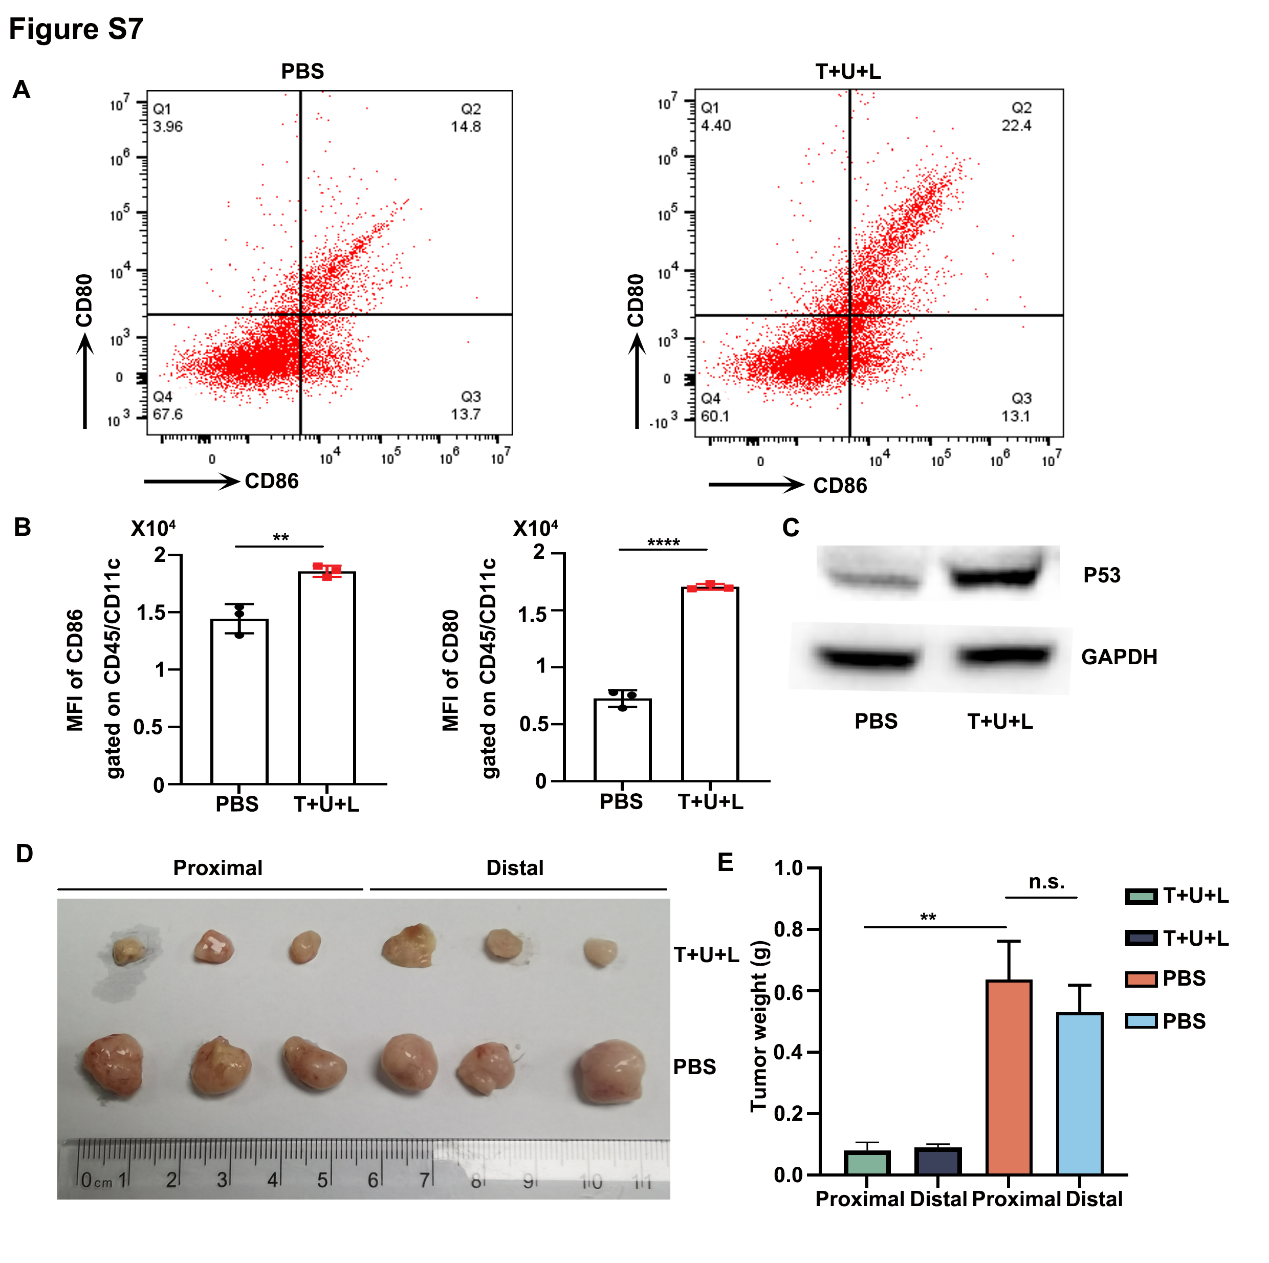


Figure S7

A. Increase of CD80+/CD86+ cells gated on CD45+/CD11c+ from lymph nodes resected from bilateral tumor models were investigated by flow cytometry assays (T+U+L indicates Ti3C2+Ultrasond+Laser).

B. Statistical analysis of mean fluorescence intensity (MFI) from flow cytometry assays were analyzed from lymph nodes resected from treatment by Ti3C2 plus ultrasound and laser.

C. Western blot assays of P53 expression from lysates of tumors from bilateral models. GAPDH was used as a loading control.

D. Tumor were harvested and photographed from bilateral subcutaneous models of H22 cells.

E. Tumor weights were recorded and statistically analyzed. ** indicates p<0.01. n.s. indicates no significant difference.

| **Treatments** | **Major findings and mechanisms** |
| --- | --- |
| Ti3C2/TiO2 | Peroxidase activity. The generation ROS upon reaction with H2O2 in tumor microenvironment. |
| Ti3C2/TiO2 nanozyme plus phototherapy | Photothermal conversion. |
| Ti3C2/TiO2 nanozyme plus sonotherapy | The enhanced generation of ROS by ultrasound and the deeper tumor treatment. |
| Ti3C2/TiO2 nanozyme plus phototherapy and sonotherapy | Integrating photothermal and sonodynamic effects to achieve image-guided tumor therapy and induce multiple anticancer immune responses |

Table S1 Summarization of major findings in this study.
